# Supplementary material for: Estimate of energy loss from internal solitary waves breaking on slopes
Source: Copernicus journal article supplement (doi:10.5194/npg-2021-30), 2021-09-13
Supplement: Supplementary file [file npg-2021-30-RC2-supplement.pdf]

In this work, the authors discussed energy loss during the ISW breaking on the slopes. Four types of interaction between ISW and slopes were discussed and a parameterization analysis method was applied in Lufeng region in SCS.

They concluded that the results could be used for the identification of “hot spot” of energy dissipation in the ocean. The results may be valuable for researchers who study the ISW on the slopes. Therefore, I recommend a minor revision for this manuscript.

Detailed comments are listed below:

1. The writing should be improved. There are many grammatical problems in the manuscript making it difficult to read. The text should be revised by a native English-speaking person.

2. The introduction needs to be significantly improved in logic and the key points should be highlighted.

3. A table should be provided in Section 2 for the parameters. The breaking of ISW also requires a clearer definition. In Page 5 Line 16, a number “3” was given but it was meaningless, similar mistakes need to be fixed.

4. More detailed explanations for the configuration of experiments should be given in Section 3. There is a mismatch between Fig. 4 and its caption, the subgraph in Fig. 4 should be marked to remind the readers which one corresponds to a particular moment.

5. How was the pseudo-energy calculated? Please provide the equations.
